# Supplementary material
Source: PubMed Central journal article supplement (PMC3869667)
Supplement: NIHMS55349-supplement-5.pdf [file NIHMS55349-supplement-5.pdf]

**Figure S5**

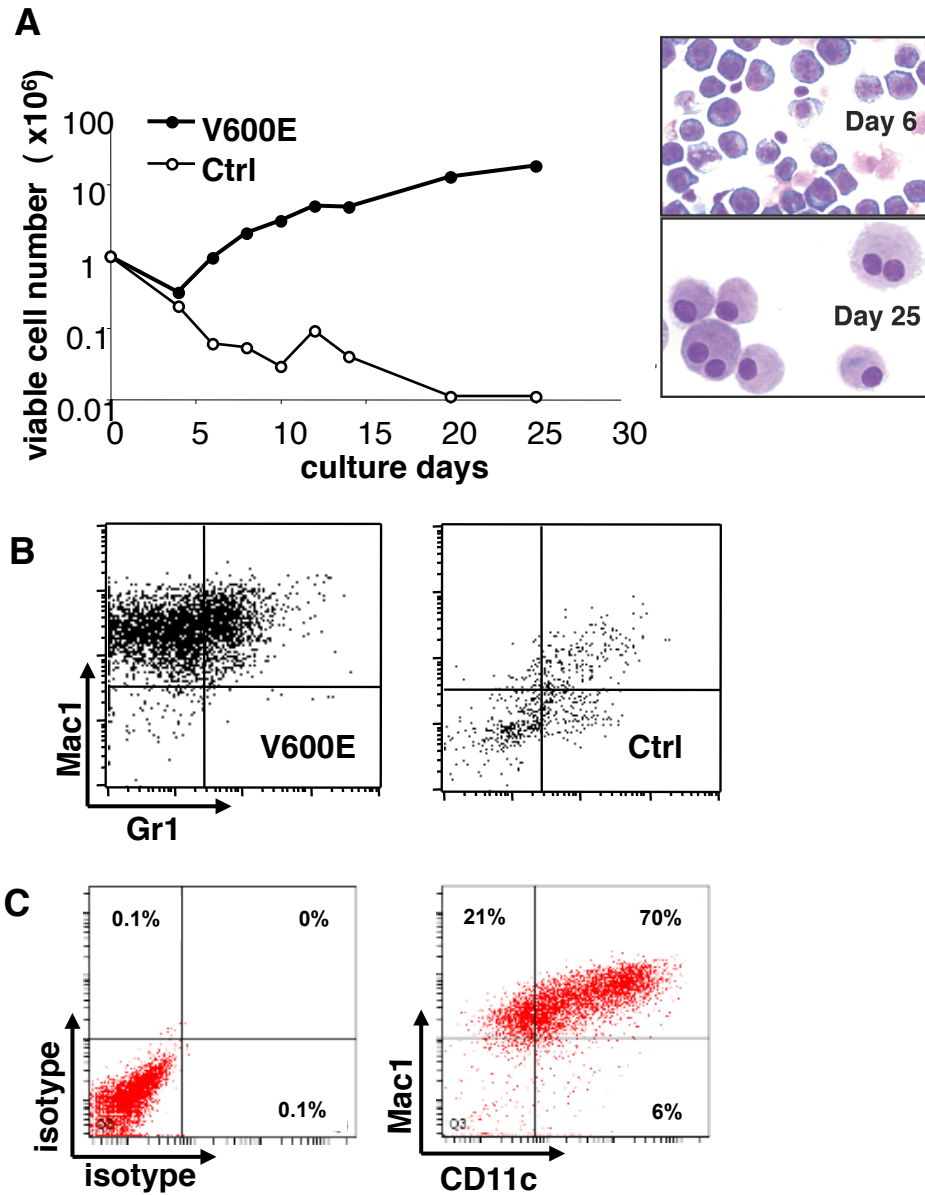

**Figure S5. In vitro liquid culture.**

- (A) A representative growth curve of Brf<sup>fV600E</sup>BM cells in serum-free liquid culture (left) and microphotographs of Giesma-staining of the cells developed on day 6 and 25 (right) shown at x200 original magnification.
- (B) A Representative Mac-1/Gr-1 plot of Brf<sup>fV600E</sup> (V600E) and control (Ctrl) BM cells cultured for 5 days.
- (C) A Representative Mac1/CD11c plot of Brf<sup>fV600E</sup>BM cells cultured for 2 weeks (right) with isotype control staining (left).
